# Supplementary material
Source: MDPI journal article supplement (https://www.mdpi.com/2076-3263/13/1/17)
Supplement: s1 [file s1]

Archive with 2 entries (2 files):
- geosciences-2085134-supplementary/Yusuf et al 2022 supplementary material Figures.pdf
- geosciences-2085134-supplementary/Yusuf et al 2022 supplementary material Tables.pdf
